# Supplementary material for: Electropolymerization of D–A–D type monomers consisting of triphenylamine and substituted quinoxaline moieties for electrochromic devices
Source: Royal Society of Chemistry journal article supplement (doi:10.1039/d1nj04074j), 2021-01-01
Supplement: d1nj04074j1.pdf [file d1nj04074j1.pdf]

## Supporting Information

### Electropolymerization of D-A-D type monomers consisting of triphenylamine and substituted quinoxaline moieties for electrochromic devices

Wenan Fu, Hongjin Chen, Yiying Han, Wenyuan Wang, Rui Zhang, and Jian Liu\*

*Jiangsu Co-Innovation Center of Efficient Processing and Utilization of Forest Resources, College of Chemical Engineering, Jiangsu Key Lab of Biomass-based Green Fuels and Chemicals, Nanjing Forestry University, Nanjing 210037, P. R. China*

\* Address correspondence to E-mail: [liu.jian@njfu.edu.cn](mailto:liu.jian@njfu.edu.cn)

### Table of contents

#### *Synthesis*

**Fig. S1**  $^1\text{H}$  NMR spectra of compound **1** in  $\text{DMSO-}d_6$ .

**Fig. S2**  $^{13}\text{C}$  NMR spectra of compound **1** in  $\text{DMSO-}d_6$ .

**Fig. S3**  $^1\text{H}$  NMR spectra of **TPAQ-Ph** in  $\text{CDCl}_3-d$ .

**Fig. S4**  $^{13}\text{C}$  NMR spectra of **TPAQ-Ph** in  $\text{CDCl}_3-d$ .

**Fig. S5**  $^1\text{H}$  NMR spectra of **TPAQ-PhOMe** in  $\text{CDCl}_3-d$ .

**Fig. S6**  $^{13}\text{C}$  NMR spectra of **TPAQ-PhOMe** in  $\text{CDCl}_3-d$ .

**Fig. S7**  $^1\text{H}$  NMR spectra of **TPAQ-Phen** in  $\text{CDCl}_3-d$ .

**Fig. S8**  $^{13}\text{C}$  NMR spectra of **TPAQ-Phen** in  $\text{CDCl}_3-d$ .

**Fig. S9** a~c) The plot of scan rate against the maximum current of **PTPAQ-Ph**, **PTPAQ-PhOMe** and **PTPAQ-Phen** thin films.

**Fig. S10** a~c) Charge/discharge curve of **PTPAQ-Ph**, **PTPAQ-PhOMe** and **PTPAQ-Phen** thin films on ITO in an electrolyte of  $\text{TPAF}_6$  in PC (0.1 M), respectively.

**Fig. S11** a~b) Absorption spectra of electrochromic device based on **PTPAQ-Ph** and **PTPAQ-Phen**; c~d) The transmittance change for the device based on **PTPAQ-Ph** and **PTPAQ-Phen** around 830 nm; e~f) Current consumption and transmittance changes monitored of the device based on **PTPAQ-Ph** and **PTPAQ-Phen** around 830 nm during 12000 s of electrochromic switching between -0.1 and 2.9 V, -0.1 and 2.8 V, respectively.

*Synthesis of N-(4-(4-(4-(diphenylamino)phenyl)benzo[c][1,2,5]thiadiazol-7-yl)phenyl)-N-phenylbenzenamine*

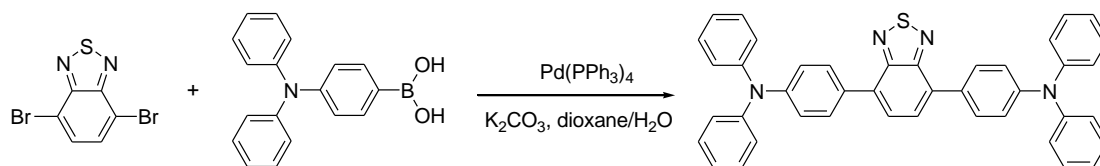

To a stirred solution of 4,7-dibromobenzo[c][1,2,5]thiadiazole (1 g, 3.4 mmol), 4-(diphenylamino)phenylboronic acid (2.36 g, 8.16 mmol) in a mixed solvent of dioxane (40 mL) and H<sub>2</sub>O (8 mL) was added potassium carbonate (3.38 g, 24.5 mmol), followed by tetrakis(triphenylphosphine)palladium (393 mg, 0.34 mmol) as a catalyst. The resulting mixture was stirred at 90 °C for 12 h under N<sub>2</sub> atmosphere. Evaporation of the organic solvent under vacuum, 50 mL of water was added, and extracted with dichloromethane. The combined organic layers were washed with water and brine, dried over anhydrous Na<sub>2</sub>SO<sub>4</sub>, and concentrated under reduced pressure. The crude product was purified by chromatography to get the desired product as an orange solid (1.95 g, yield: 93%). <sup>1</sup>H NMR (600 MHz, CDCl<sub>3</sub>) δ 7.9 (m, *J* = 9 Hz, 4H), 7.77 (s, 2H), 7.29 (t, *J* = 7.2 Hz, 8H), 7.26 ~ 7.18 (m, 12H), 7.07 (t, *J* = 7.2 Hz, 4H). <sup>13</sup>C NMR (150 MHz, CDCl<sub>3</sub>) δ 154.29, 148.11, 147.62, 132.29, 131.14, 130.03, 129.49, 127.56, 125.02, 123.42, 123.07.

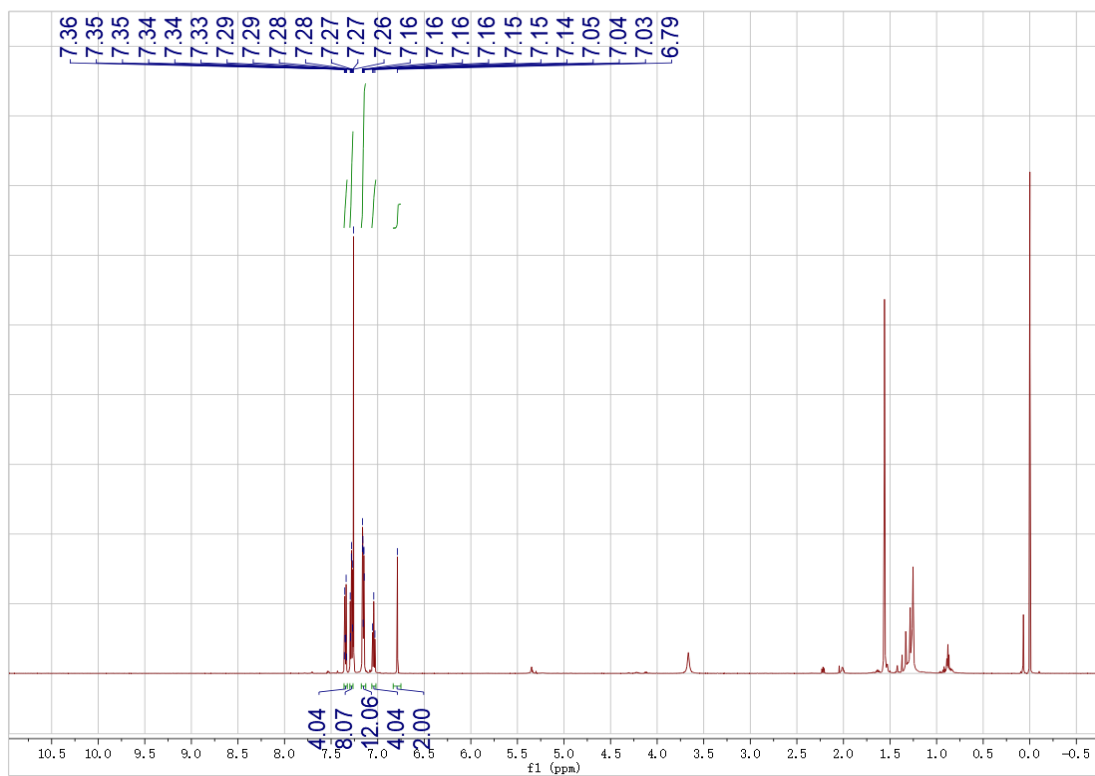

**Fig. S1**  $^1\text{H}$  NMR spectra of compound **1** in  $\text{DMSO-}d_6$ .

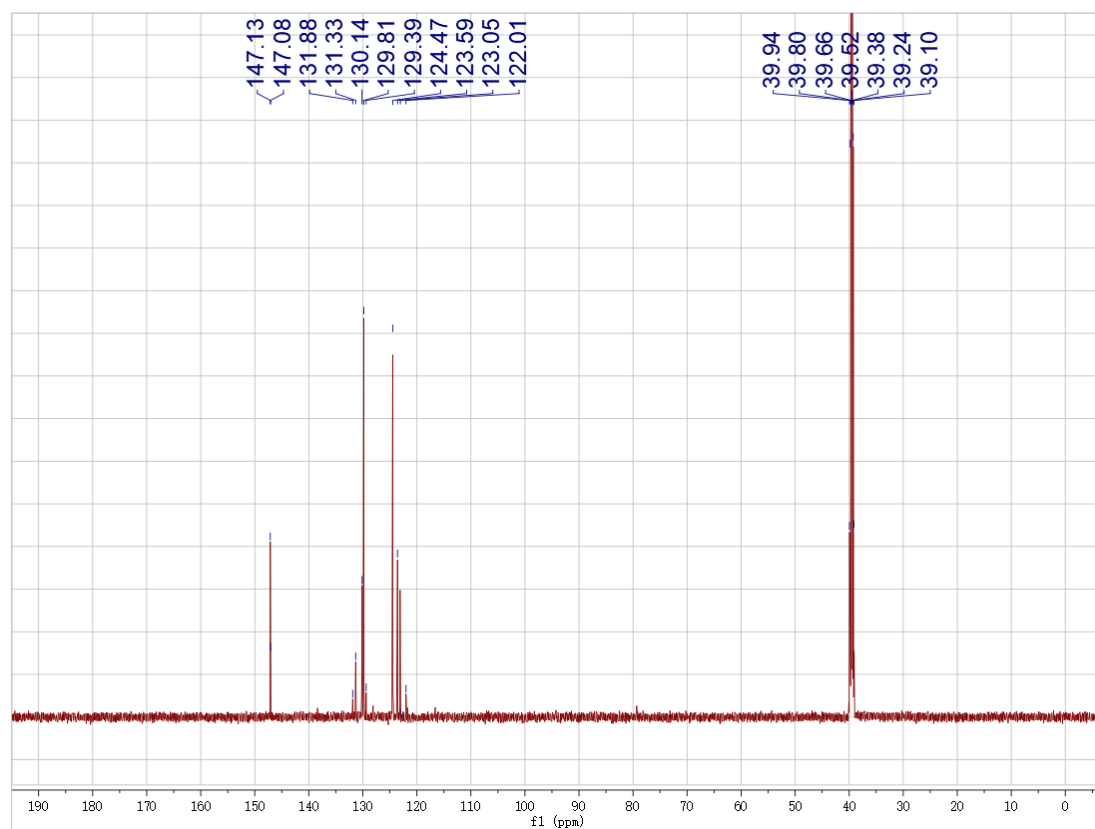

**Fig. S2**  $^{13}\text{C}$  NMR spectra of compound **1** in  $\text{DMSO-}d_6$ .

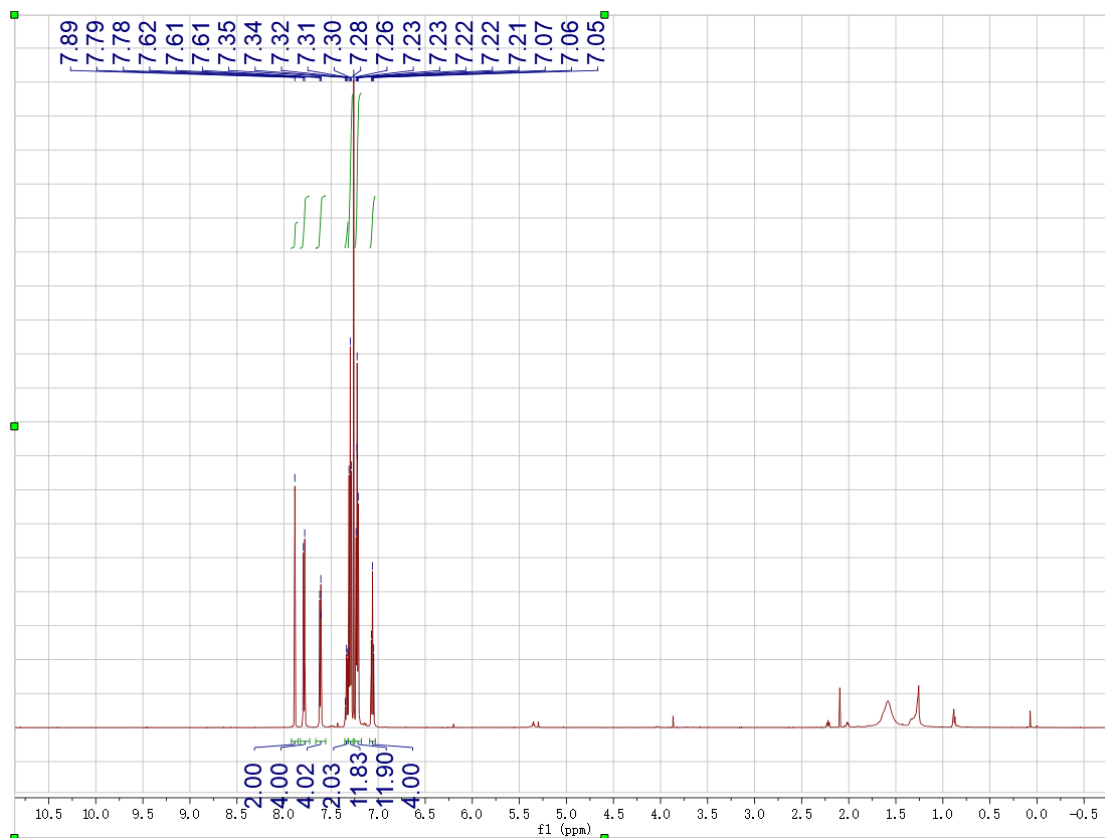

Fig. S3  $^1\text{H}$  NMR spectra of TPAQ-Ph in  $\text{CDCl}_3$ .

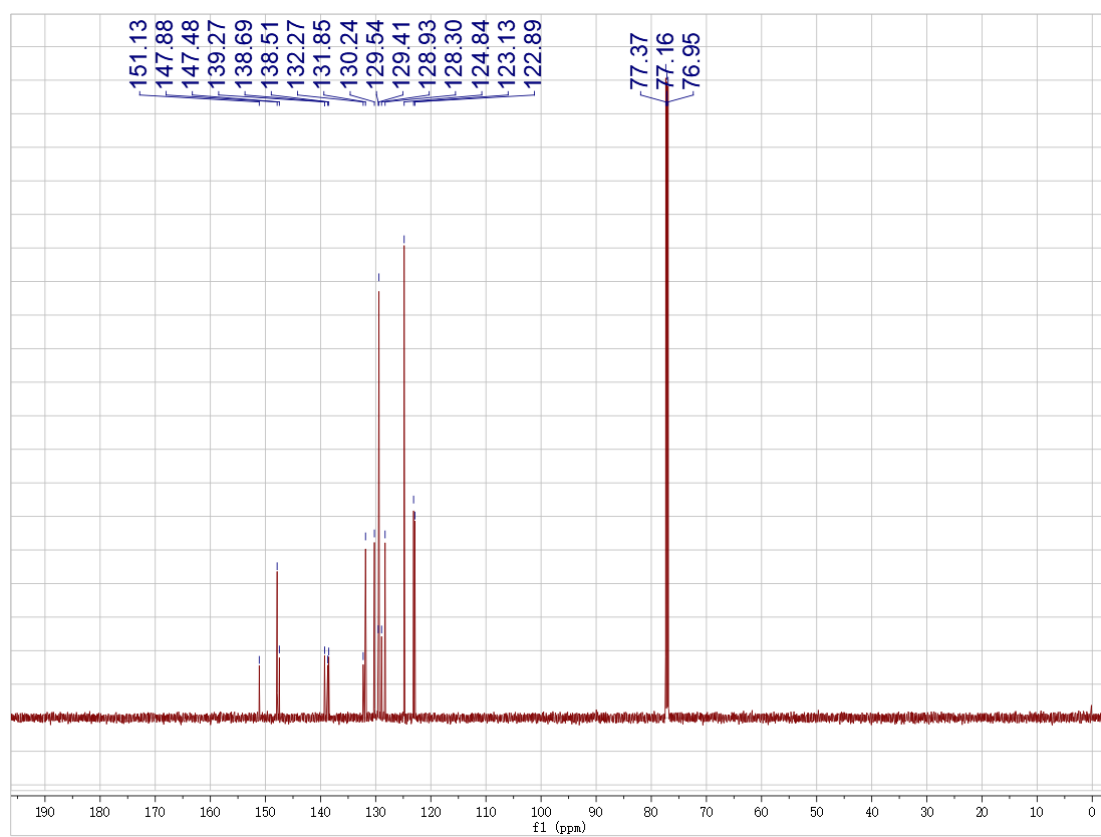

Fig. S4  $^{13}\text{C}$  NMR spectra of TPAQ-Ph in  $\text{CDCl}_3$ .

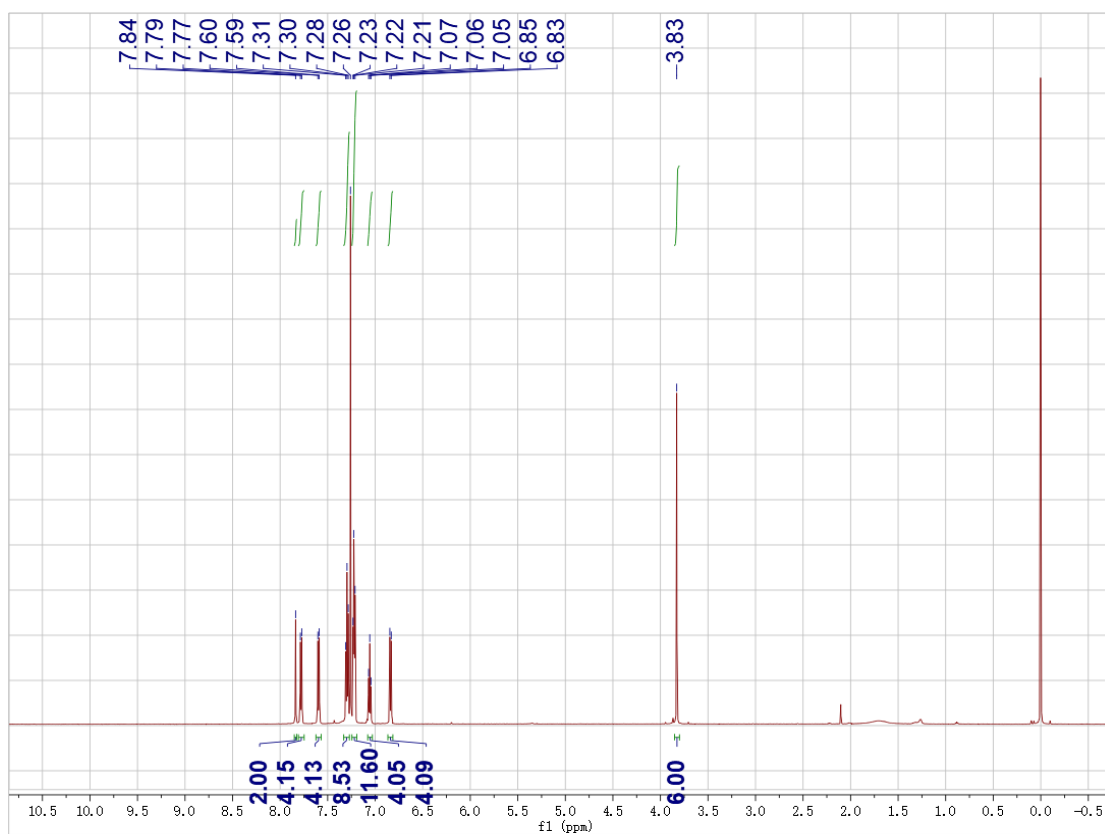

Fig. S5  $^1\text{H}$  NMR spectra of TPAQ-PhOMe in  $\text{CDCl}_3$ .

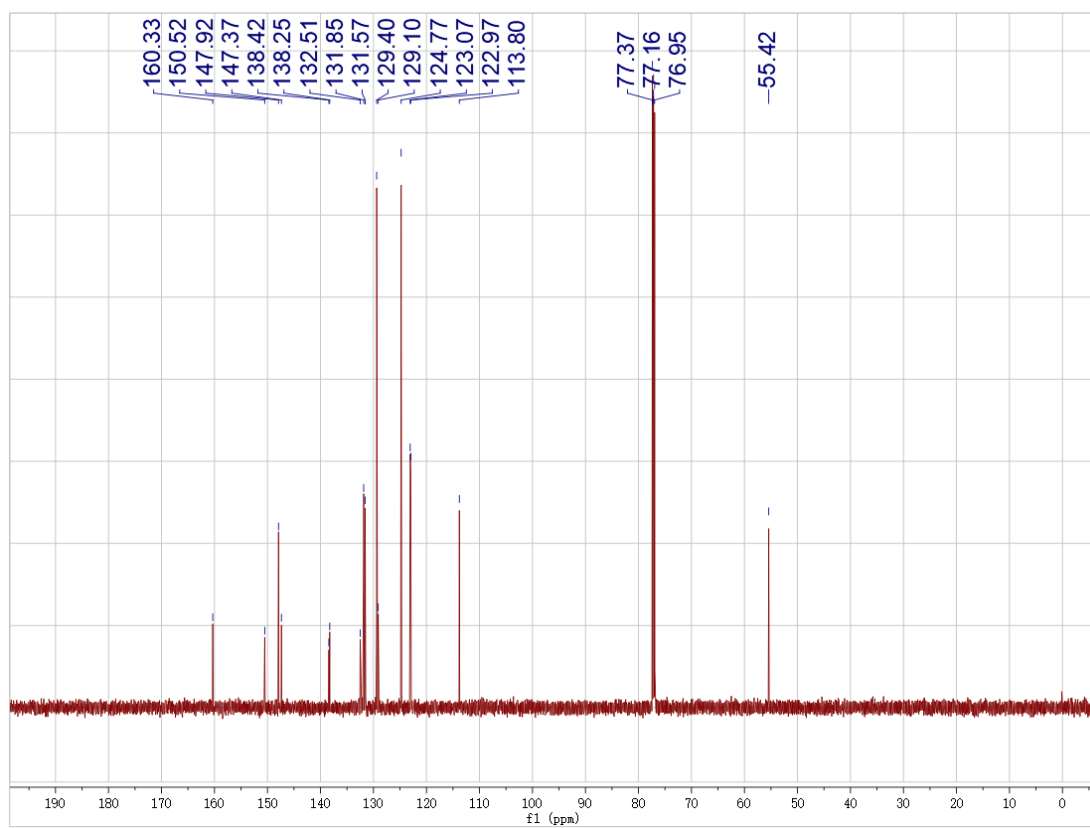

Fig. S6  $^{13}\text{C}$  NMR spectra of TPAQ-PhOMe in  $\text{CDCl}_3$ .

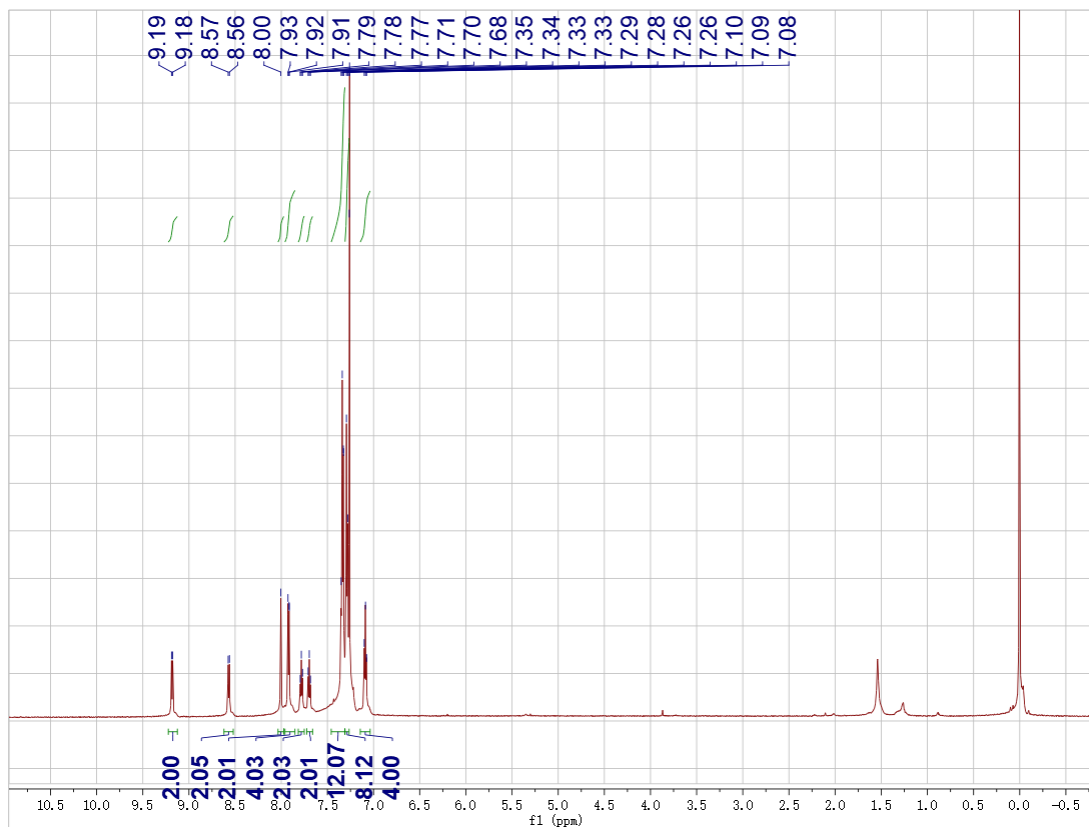

**Fig. S7**  $^1\text{H}$  NMR spectra of TPAQ-Phen in  $\text{CDCl}_3$ .

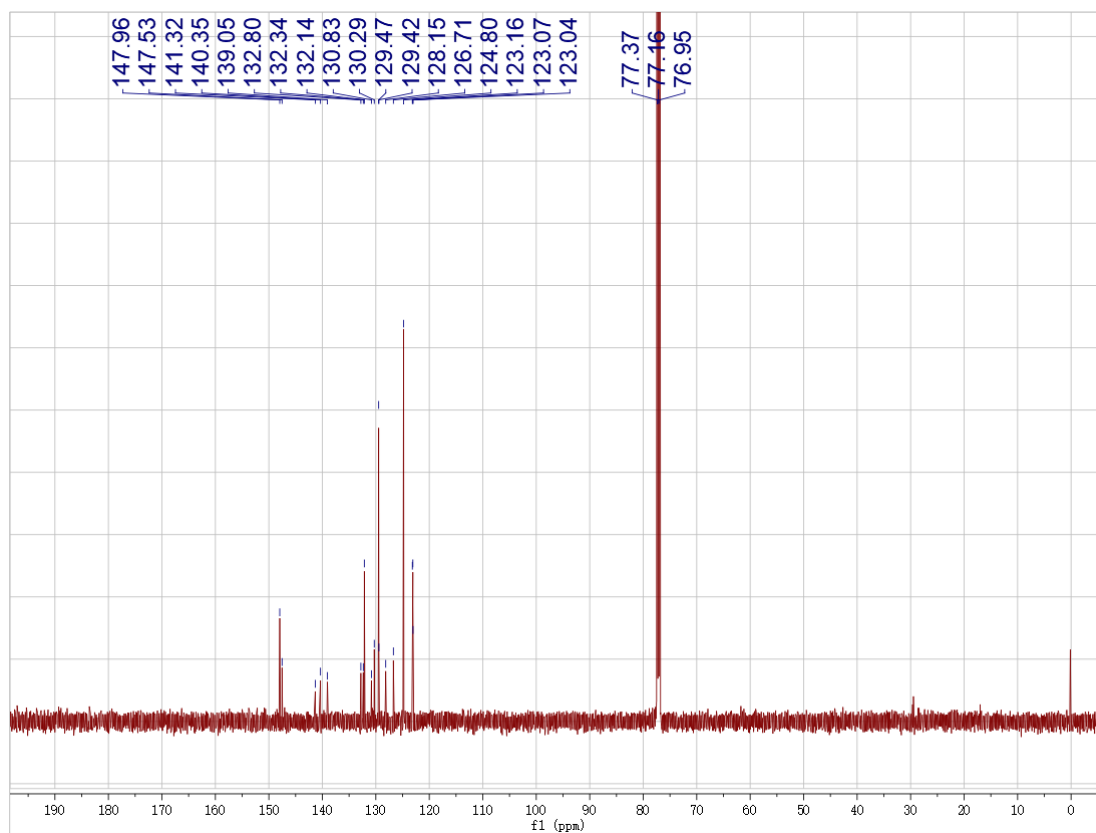

**Fig. S8**  $^{13}\text{C}$  NMR spectra of TPAQ-Phen in  $\text{CDCl}_3$ .

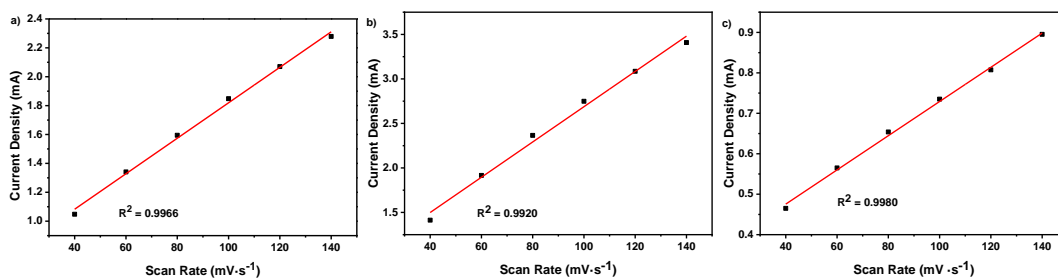

**Fig. S9** a~c) The plot of scan rate against the maximum current of **PTPAQ-Ph**, **PTPAQ-PhOMe** and **PTPAQ-Phen** thin films.

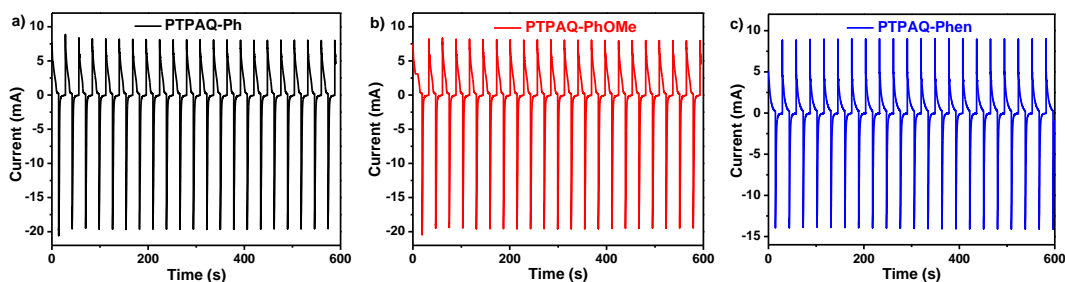

**Fig. S10** a~c) Charge/discharge curve of **PTPAQ-Ph**, **PTPAQ-PhOMe** and **PTPAQ-Phen** thin films on ITO in an electrolyte of TPAF<sub>6</sub> in PC (0.1 M), respectively.

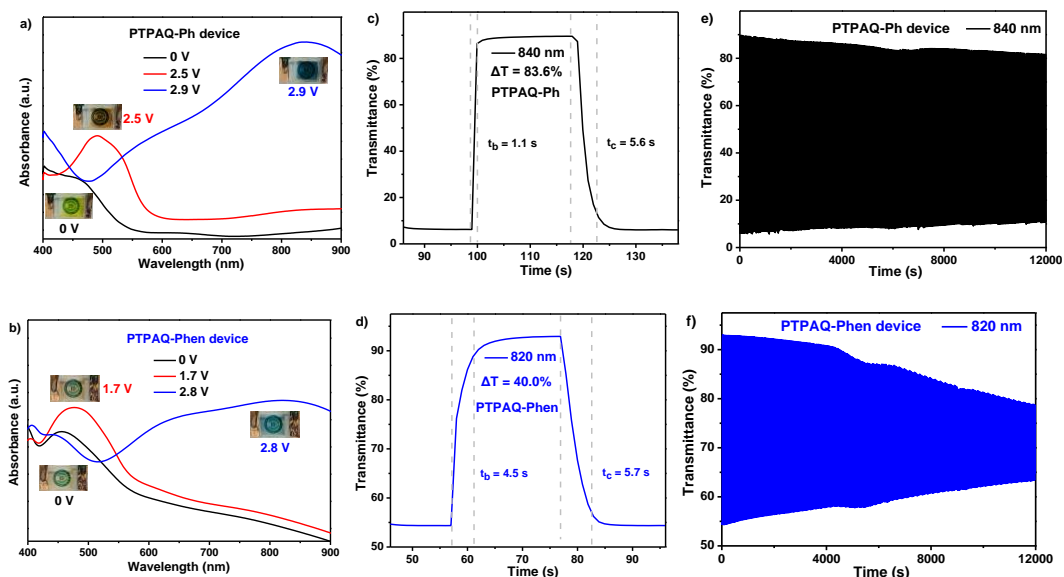

**Fig. S11** a~b) Absorption spectra of electrochromic device based on **PTPAQ-Ph** and **PTPAQ-Phen**; c~d) The transmittance change for the device based on **PTPAQ-Ph** and **PTPAQ-Phen** around 830 nm; e~f) Current consumption and transmittance changes monitored of the device based on **PTPAQ-Ph** and **PTPAQ-Phen** around 830 nm during 12000 s of electrochromic switching between -0.1 and 2.9 V, -0.1 and 2.8 V, respectively.

## Reference

1. Frisch, M. J.; Trucks, G. W.; Schlegel, H. B.; Scuseria, G. E.; Robb, M. A.; Cheeseman, J. R.; Scalmani, G.; Barone, V.; Mennucci, B.; Petersson, G. A.; Nakatsuji, H.; Caricato, M.; Li, X.; Hratchian, H. P.; Izmaylov, A. F.; Bloino, J.; Zheng, G.; Sonnenberg, J. L.; Hada, M.; Ehara, M.; Toyota, K.; Fukuda, R.; Hasegawa, J.; Ishida, M.; Nakajima, T.; Honda, Y.; Kitao, O.; Nakai, H.; Vreven, T.; Jr. Montgomery, J. A.; Peralta, J. E.; Ogliaro, F.; Bearpark, M.; Heyd, J. J.; Brothers, E.; Kudin, K. N.; Staroverov, V. N.; Kobayashi, R.; Normand, J.; Raghavachari, K.; Rendell, A.; Burant, J. C.; Iyengar, S. S.; Tomasi, J.; Cossi, M.; Rega, N.; Millam, J. M.; Klene, M.; Knox, J. E.; Cross, J. B.; Bakken, V.; Adamo, C.; Jaramillo, J.; Gomperts, R.; Stratmann, R. E.; Yazyev, O.; Austin, A. J.; Cammi, R.; Pomelli, C.; Ochterski, J. W.; Martin, R. L.; Morokuma, K.; Farkas, O.; Foresman, J. B.; Fox, D. J. *Gaussian 16, Rev. A.03*; Gaussian, Inc.: Wallingford, CT, **2016**.
